# Supplementary material
Source: MDPI journal article supplement (https://www.mdpi.com/2673-4125/3/4/42)
Supplement: s1 [file s1 › biophysica-2689566-supplementary.pdf]

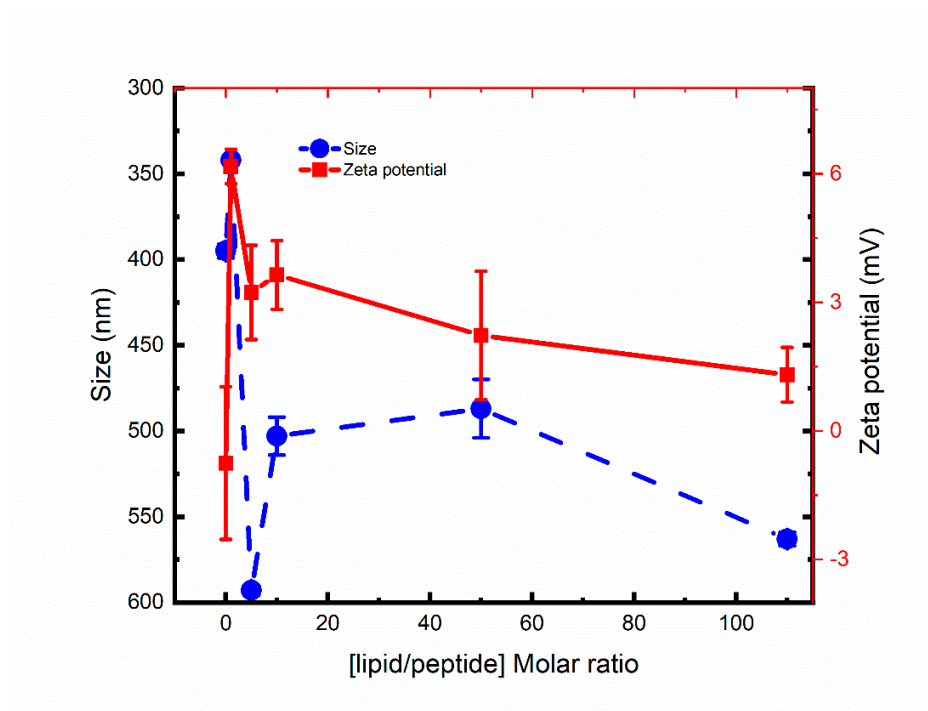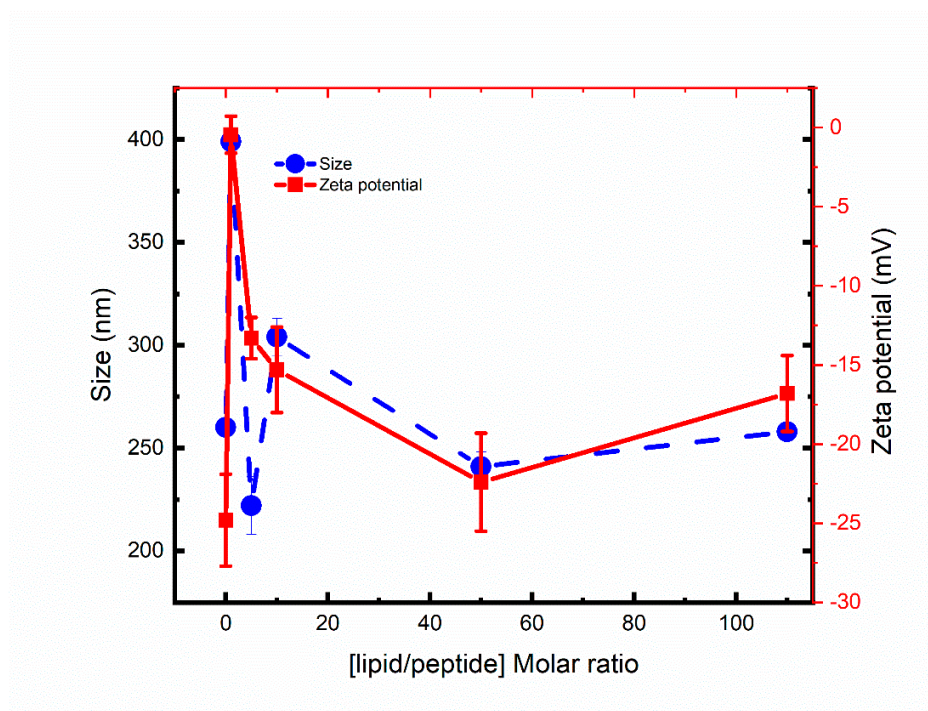

Figure S1. Particle sizes and  $\zeta$ -potential of penetratin with its complexes of healthy (top) and cancer (bottom) cells at various lipid/peptide molar ratios, measured by dynamic light scattering. Data are the mean  $\pm$  SD (n = 3).
